# Supplementary material for: The Oral Health of a Group of 19th Century South Australian Settlers in Relation to Their General Health and Compared with That of Contemporaneous Samples
Source: MDPI journal article supplement (doi:10.3390/dj11040099), 2023-04-07
Supplement: s1 [file s1]

The oral health of a group of 19<sup>th</sup> Century South Australian settlers in relation to their general health and compared with that of contemporaneous samples. Gurr et al., 2023.

**Table S9.** Dental calculus – an indication of the number, and percentage of teeth affected by calculus with the location and severity of the deposit for the adults of the St Mary’s Cemetery sample.

| St Mary’s Burial I/D | Sex | Estimation of age range skeletal & eruption findings (years) | Total number of permanent teeth present | Number of Teeth with calculus | Percentage of teeth with calculus | Calculus Present<br><br>Tooth-type with calculus present<br><br>FDI notation number/s | Calculus Location<br><br>1 = enamel surface only<br>2 = Root*<br><br>(Brothwell, 1963; Connell and Rauxloh, 2003; Powers, 2012) | Calculus Severity<br><br>1 = small (slight)<br>2 = medium<br>3 = large (heavy/ considerable)<br><br>(Brothwell, 1963; Connell and Rauxloh, 2003; Powers, 2012) |
|----------------------|-----|--------------------------------------------------------------|-----------------------------------------|-------------------------------|-----------------------------------|---------------------------------------------------------------------------------------|---------------------------------------------------------------------------------------------------------------------------------|----------------------------------------------------------------------------------------------------------------------------------------------------------------|
| <b>SMB 05</b>        | F   | 20-29                                                        | 6                                       | 6                             | 100%                              | 32, 35 41, 42, 43, 44                                                                 | All teeth = enamel                                                                                                              | 35, 44 = small (slight),<br>32, 41, 42, & 43 = medium                                                                                                          |
| <b>SMB 53 C</b>      | F   | 30-39                                                        | 9                                       | 1                             | 11%                               | 42                                                                                    | 42 = root                                                                                                                       | 42 = small                                                                                                                                                     |
| <b>SMB 66 B</b>      | F   | 30-39                                                        | 17                                      | 6                             | 35%                               | 31, 32, 41, 42, 43, 44                                                                | All teeth = root                                                                                                                | All teeth = small                                                                                                                                              |
| <b>SMB 73</b>        | M   | 30-39                                                        | 19                                      | 0                             | 0                                 | N/A                                                                                   | N/A                                                                                                                             | N/A                                                                                                                                                            |
| <b>SMB 06</b>        | M   | 40-49                                                        | 24                                      | 14                            | 58%                               | 12, 16, 17, 23, 25, 26, 27, 32, 33, 37, 41, 44, 45, 47                                | 12, 17, 23, 26, 32, 33, 37, 45 = enamel,<br>16, 25, 27, 47 = root                                                               | 12, 17, 23, 25, 26, 27, 32, 33, 37, 44, 45, 47 = small,<br>16 = medium                                                                                         |
| <b>SMB 09</b>        | M   | 40-49                                                        | 22                                      | 15                            | 68%                               | 12, 13, 16, 26, 27, 31, 32, 36, 37, 43, 44, 45, 46, 47, 48                            | 12, 13, 16, 22, 23, 24, 26, 31, 32, 36, 43, 44, 45, 46, 47, 48 = enamel,<br>26, 37 = root                                       | All teeth = small                                                                                                                                              |
| <b>SMB 57</b>        | M   | 40-49                                                        | 25                                      | 14                            | 56%                               | 15, 16, 17, 18, 22, 26, 27, 32, 33, 34, 35, 36, 44, 45                                | All teeth = enamel                                                                                                              | All teeth = small                                                                                                                                              |
| <b>SMB 61</b>        | F   | 40-49                                                        | 7                                       | 3                             | 43%                               | 32, 42, 44                                                                            | 32 & 42 = enamel,<br>44 = root                                                                                                  | All teeth = small                                                                                                                                              |
| <b>SMB 72</b>        | M   | 40-49                                                        | 29                                      | 2                             | 7%                                | 42, 43                                                                                | 42 & 43 = enamel                                                                                                                | All teeth = small                                                                                                                                              |
| <b>SMB 78</b>        | M   | 40-49                                                        | 4                                       | 4                             | 100%                              | 13, 14, 34, 35                                                                        | All teeth = enamel                                                                                                              | All teeth = small                                                                                                                                              |
| <b>SMB 83</b>        | M   | 40-49                                                        | 16                                      | 14                            | 88%                               | 13, 14, 17, 23, 24, 27, 28, 33, 34, 37, 42, 43, 47, 48                                | 14, 17, 23, 24, 27, 28, 42, 43, 47, 48 = enamel,<br>13, 33, 34, 37, 42 = root                                                   | 13, 14, 17, 28, 33, 34, 37 = small,<br>23, 24, 27, 42, 43, 47, 48 = medium                                                                                     |
| <b>SMB 85</b>        | M   | 40-49                                                        | 2                                       | 0                             | 0                                 | N/A                                                                                   | N/A                                                                                                                             | N/A                                                                                                                                                            |
| <b>SMB 14</b>        | M   | 50-59                                                        | 2                                       | 0                             | 0                                 | N/A                                                                                   | N/A                                                                                                                             | N/A                                                                                                                                                            |
| <b>SMB 23</b>        | M   | 50-59                                                        | 21                                      | 0                             | 0                                 | N/A                                                                                   | N/A                                                                                                                             | N/A                                                                                                                                                            |
| <b>SMB 59</b>        | M   | 50-59                                                        | 15                                      | 1                             | 7%                                | 46                                                                                    | 46 = enamel                                                                                                                     | 46 = small                                                                                                                                                     |
| <b>SMB 63</b>        | M   | 50-59                                                        | 3                                       | 0                             | 0                                 | N/A                                                                                   | N/A                                                                                                                             | N/A                                                                                                                                                            |
| <b>SMB 68</b>        | M   | 50-59                                                        | 19                                      | 0                             | 0                                 | N/A                                                                                   | N/A                                                                                                                             | N/A                                                                                                                                                            |

The oral health of a group of 19<sup>th</sup> Century South Australian settlers in relation to their general health and compared with that of contemporaneous samples. Gurr et al., 2023.

**Notes:** F = female, M = male. † Dental eruption age range – “Over 23.5 years”= Estimation of dental age range is based on development and when this is complete. FDI = Fédération Dentaire Internationale tooth identification notation system. \*Guidelines, system, and criteria followed as set out by Brothwell, 1963; Connell and Rauxloh, 2003; Powers, 2012, of the Museum of London.

## References:

- Anson, T.J.**, 2004. The bioarchaeology of the St. Mary's free ground burials: reconstruction of colonial South Australian lifeways, Thesis (Ph.D.)-University of Adelaide, Dept. of Anatomical Sciences, 2004.
- AlQahtani, S.J.**, Hector, M.P., Liversidge, H.M., 2010. Brief communication: The London atlas of human tooth development and eruption, *American Journal of Physical Anthropology* 142, 481-490.
- Brothwell, D.R.** 1963. *Digging up Bones: the excavation, treatment and study of the human skeletal remains*. British Museum Natural History: London.
- Connell, B.**, and Rauxloh, P. 2003. *A Rapid Method for Recording Human Skeletal Data*. Museum of London: London.
- FDI World Dental Federation**, 2022. FDI Two-Digit Notation, FDI World Dental Federation, France.
- Powers, N.** 2012. *Human Osteology Method Statement*. Museum of London: London.
