# Supplementary material for: The Oral Health of a Group of 19th Century South Australian Settlers in Relation to Their General Health and Compared with That of Contemporaneous Samples
Source: MDPI journal article supplement (doi:10.3390/dj11040099), 2023-04-07
Supplement: s1 [file s1]

The oral health of a group of 19<sup>th</sup> Century South Australian settlers in relation to their general health and compared with that of contemporaneous samples. Gurr et al., 2023.

**Supplementary Material Table S5.** Additional Information from the Statistical Analysis of intra- and inter-operator reliability for each of the methods assessed.

| Test           | Comparison | Surface/Method          | Summary Results       |              |                      |
|----------------|------------|-------------------------|-----------------------|--------------|----------------------|
|                |            |                         | Agreement             | AC2          | Percentage agreement |
| Caries         |            |                         |                       |              |                      |
| Inter-operator | LV         | Radiolucency            | Substantial – Perfect | 0.71 – 1.00  | 79 – 100             |
|                |            | Caries - Present        | Poor – Perfect        | -1.00 – 1.00 | 0 – 100              |
|                |            | Caries on CEJ           | Poor – Perfect        | -0.33 – 1.00 | 0 – 100              |
|                |            | Caries above CEJ        | Poor – Perfect        | -0.45 – 1.00 | 0 – 100              |
|                |            | Caries below CEJ        | Poor – Perfect        | -0.33 – 1.00 | 0 – 100              |
|                |            | Caries on distal        | Poor – Perfect        | -0.33 – 1.00 | 0 – 100              |
|                |            | Caries on labial/buccal | Perfect               | All 1.00     | All 100%             |
|                |            | Caries on lingual       | Perfect               | All 1.00     | All 100%             |
|                |            | Caries on mesial        | Poor – Perfect        | -0.45 – 1.00 | 0 – 100              |
|                |            | Caries on occlusal      | Perfect               | All 1.00     | All 100%             |
|                | Macro      | Caries - Present        | Fair – Perfect        | 0.20 – 1.00  | 50 – 100             |
|                |            | Caries on CEJ           | Poor – Perfect        | -0.45 – 1.00 | 0 – 100              |
|                |            | Caries above CEJ        | Poor – Perfect        | -0.45 – 1.00 | 0 – 100              |
|                |            | Caries below CEJ        | Fair – Perfect        | 0.27 – 1.00  | 50 – 100             |
|                |            | Caries on distal        | Fair – Perfect        | 0.27 – 1.00  | 50 – 100             |
|                |            | Caries on labial/buccal | Poor – Perfect        | -0.33 – 1.00 | 0 – 100              |
|                |            | Caries on lingual       | Fair – Perfect        | 0.33 – 1.00  | 50 – 100             |
|                |            | Caries on mesial        | Poor – Perfect        | -0.45 – 1.00 | 0 – 100              |
|                |            | Caries on occlusal      | Fair – Perfect        | 0.27 – 1.00  | 50 – 100             |
|                | Radio      | Radiolucency            | Substantial – Perfect | 0.73 – 1.00  | 83 – 100             |
|                |            | Caries - Present        | Poor – Perfect        | -0.60 – 1.00 | 0 – 100              |
|                |            | Caries on distal        | Poor – Perfect        | -0.23 – 1.00 | 0 – 100              |
|                |            | Caries on mesial        | Fair – Perfect        | 0.27 – 1.00  | 50 – 100             |
| Intra-operator | LV         | Radiolucency            | Substantial – Perfect | 0.77 – 1.00  | 83 – 100             |
|                |            | Caries - Present        | Fair – Perfect        | 0.20 – 1.00  | 50 – 100             |

The oral health of a group of 19<sup>th</sup> Century South Australian settlers in relation to their general health and compared with that of contemporaneous samples. Gurr et al., 2023.

|  |       |                         |                       |             |          |
|--|-------|-------------------------|-----------------------|-------------|----------|
|  |       | Caries on CEJ           | Fair – Perfect        | 0.38 – 1.00 | 50 – 100 |
|  |       | Caries above CEJ        | Fair – Perfect        | 0.38 – 1.00 | 50 – 100 |
|  |       | Caries below CEJ        | Fair – Perfect        | 0.27 – 1.00 | 50 – 100 |
|  |       | Caries on distal        | Fair – Perfect        | 0.27 – 1.00 | 50 – 100 |
|  |       | Caries on labial/buccal | Perfect               | All 1.00    | All 100% |
|  |       | Caries on lingual       | Fair – Perfect        | 0.38 – 1.00 | 50 – 100 |
|  |       | Caries on mesial        | Fair – Perfect        | 0.38 – 1.00 | 50 – 100 |
|  |       | Caries on occlusal      | Fair – Perfect        | 0.38 – 1.00 | 50 – 100 |
|  | Macro | Radiolucency            | Moderate – Perfect    | 0.53 – 1.00 | 67 – 100 |
|  |       | Caries - Present        | Fair – Perfect        | 0.27 – 1.00 | 50 – 100 |
|  |       | Caries on CEJ           | Fair – Perfect        | 0.27 – 1.00 | 50 – 100 |
|  |       | Caries above CEJ        | Fair – Perfect        | 0.27 – 1.00 | 50 – 100 |
|  |       | Caries below CEJ        | Fair – Perfect        | 0.27 – 1.00 | 50 – 100 |
|  |       | Caries on distal        | Fair – Perfect        | 0.27 – 1.00 | 50 – 100 |
|  |       | Caries on labial/buccal | Fair – Perfect        | 0.27 – 1.00 | 50 – 100 |
|  |       | Caries on lingual       | Fair – Perfect        | 0.38 – 1.00 | 50 – 100 |
|  |       | Caries on mesial        | Fair – Perfect        | 0.27 – 1.00 | 50 – 100 |
|  |       | Caries on occlusal      | Fair – Perfect        | 0.27 – 1.00 | 50 – 100 |
|  | Radio | Radiolucency            | Substantial - Perfect | 0.66 – 1.00 | 75 – 100 |
|  |       | Caries - Present        | Fair – Perfect        | 0.20 – 1.00 | 50 – 100 |
|  |       | Caries on distal        | Fair – Perfect        | 0.27 – 1.00 | 50 – 100 |
|  |       | Caries on mesial        | Fair – Perfect        | 0.27 – 1.00 | 50 – 100 |
