# Supplementary material for: The Oral Health of a Group of 19th Century South Australian Settlers in Relation to Their General Health and Compared with That of Contemporaneous Samples
Source: MDPI journal article supplement (doi:10.3390/dj11040099), 2023-04-07
Supplement: s1 [file s1]

The oral health of a group of 19<sup>th</sup> Century South Australian settlers in relation to their general health and compared with that of contemporaneous samples. Gurr et al., 2023.

**Table S10.** Enamel Hypoplastic Defects \_ St Mary Cemetery Sample.

| St Mary's ID   | Estimation of age (skeletal & eruption findings) (years) | Sex | Total number of teeth present | Permanent and/or primary dentition                   | Tooth type/s affected by EH defects (anatomical tooth classification)                                                                              | Tooth type/s affected by EH defects (*FDI notation numbers) | Total number of teeth with EH defects | Percentage of teeth affected by EH defects | Type of EH defect/s present | Number of EH defects per tooth                                                                                                                                     | Antemortem tooth loss (*FDI notation numbers) ( <i>evidence of healing or healed alveolar bone in the original position of the tooth</i> ) |
|----------------|----------------------------------------------------------|-----|-------------------------------|------------------------------------------------------|----------------------------------------------------------------------------------------------------------------------------------------------------|-------------------------------------------------------------|---------------------------------------|--------------------------------------------|-----------------------------|--------------------------------------------------------------------------------------------------------------------------------------------------------------------|--------------------------------------------------------------------------------------------------------------------------------------------|
| <b>SMB 58</b>  | 0-2                                                      | U   | 11                            | <i>All primary teeth</i>                             | Upp R & L Cent I<br>Upp R & L Lat I,<br>Low L Lat I, Upp R m1, Low L & R m1                                                                        | 51, 52, 54, 61, 62, 72, 74, 84                              | 8                                     | 72%                                        | Linear & pits               | 51, 61 = 1 line, 52, 62 = 1 line & 1 pit, 54, 72, 84 = group of multiple pits,                                                                                     | None                                                                                                                                       |
| <b>SMB 11</b>  | 0-2                                                      | U   | 19                            | primary                                              | Upp R & L Canines<br>Low R & L Canines                                                                                                             | 53, 63, 73, 83                                              | 4                                     | 21%                                        | Pits                        | 53, 63, 73 & 83 = group of multiple pits                                                                                                                           | None                                                                                                                                       |
| <b>SMB 04A</b> | 3-5                                                      | U   | 19                            | primary                                              | Low R & L Cent I<br>Low R & L Lat I                                                                                                                | 71, 72, 81, 82                                              | 4                                     | 21%                                        | Pits                        | 71, 72, 81 & 82 = small pits in a line                                                                                                                             | None                                                                                                                                       |
| <b>SMB 35</b>  | 6-9                                                      | U   | 11                            | primary                                              | Upp L Canine                                                                                                                                       | 63                                                          | 1                                     | 9%                                         | Pits                        | 63= 1 pit                                                                                                                                                          | None                                                                                                                                       |
| <b>SMB 19</b>  | 6-9                                                      | U   | 22                            | <i>Mixed dentition:</i><br>7 primary<br>15 Permanent | <i>Primary teeth:</i><br>Low R canine<br><i>Permanent teeth:</i><br>Upp R & L Cent I,<br>Canine, P1, P2, Upp L Lat I. Low R Lat I.                 | 12, 13, 14, 15, 21, 22, 42, 83                              | 8                                     | 36%                                        | Linear & pit                | 12= 1 pit, 13 = 1 pit, 14 = 1 pit, 15 = group of multiple pits, 21 = 1 line, 22 = 1 pit, 42 = 1 pit, 83= 1 pit                                                     | None                                                                                                                                       |
| <b>SMB 51</b>  | 10-15                                                    | U   | 16                            | 1 primary<br>15 Permanent                            | <i>Permanent teeth:</i><br>Upp R Cent I, Canine, P1, M1, Upp L Lat I, Canine, P1, P2, M1, Low L P1, M1                                             | 12, 13, 14, 16, 22, 23, 24, 25, 26, 34, 36                  | 11                                    | 69%                                        | Linear & pit                | 12, 13 = 2 lines, 14, 24, 36 = 1 line & 1 pit, 16 = 1 line & a group of multiple pits, 22, 23, 26 = 2 lines, 25 = 2 lines & a group of multiple pits, 34 = 3 lines | None                                                                                                                                       |
| <b>SMB 52B</b> | 10-15                                                    | U   | 17                            | 2 primary<br>15 permanent                            | <i>Permanent teeth:</i><br>Upp R Cent I, Lat I, Canine, M1, Upp L Cent I, Canine, M1, Low L Cent I, Lat I, Canine, M1, Low R Cent I, Lat I, Canine | 11, 12, 13, 16, 21, 23, 26, 31, 32, 33, 36, 14, 42, 43      | 14                                    | 82%                                        | Linear & pit                | 11, 12, 23, 26, 31, 32, 43 = 1 line, 13, 33, 42 = 2 lines, 16, 21, 36 = 1 pit, 41 = 1 line & 1 pit                                                                 | None                                                                                                                                       |
| <b>SMB 70</b>  | 10-15                                                    | U   | 8                             | 2 primary<br>6 Permanent                             | <i>Primary teeth:</i><br>Upp R & L Canines<br><i>Permanent teeth:</i><br>Upp L Cent I, M1.                                                         | 53, 21, 63, 26                                              | 4                                     | 50%                                        | Linear & Pits               | 53, 63, 26 = a group of multiple pits, 21 = 3 lines & a group of multiple pits                                                                                     | None                                                                                                                                       |

The oral health of a group of 19<sup>th</sup> Century South Australian settlers in relation to their general health and compared with that of contemporaneous samples. Gurr et al., 2023.

|                |       |   |    |                      |                                                                                                                                            |                                                                                |    |     |               |                                                                                                                                                                                                    |                                                                                        |
|----------------|-------|---|----|----------------------|--------------------------------------------------------------------------------------------------------------------------------------------|--------------------------------------------------------------------------------|----|-----|---------------|----------------------------------------------------------------------------------------------------------------------------------------------------------------------------------------------------|----------------------------------------------------------------------------------------|
| <b>SMB 28</b>  | 10-15 | U | 26 | <i>All Permanent</i> | Upp R Cent I, Lat I, P2, M1, Upp L Lat I, Canine, P2, M1, M2, Low L Cent I, Lat I, Canine, P1, P2, Low R Cent I, Lat I, Canine, P1, P2, M2 | 11, 12, 15, 16, 22, 23, 25, 26, 27, 31, 32, 33, 34, 35, 41, 42, 43, 44, 45, 47 | 20 | 77% | Linear & pit  | 11, 16, 27, 47 = a group of multiple pits (in 2 lines), 12, 22 = 2 lines, 15, 25, 41 = 1 pit<br>23, 43 = 3 lines, 26 = 1 line & a group of multiple pits, 31, 32, 33, 34, 35, 42, 44, 45 = 1 line, | None                                                                                   |
| <b>SMB 79</b>  | 16-19 | U | 25 | Permanent            | Upp R Canine, Upp L Canine, M2, Low R & L Canines                                                                                          | 13, 23, 27, 33, 43                                                             | 5  | 20% | Linear & pit  | 13 = 1 pit, 23, 27 = a group of multiple pits, 33 = 2 lines, 43 = 1 line & a group of multiple pits                                                                                                | 36                                                                                     |
| <b>SMB 05</b>  | 20-29 | F | 6  | Permanent            | Low R Cent I, Lat I                                                                                                                        | 41, 42                                                                         | 2  | 33% | Linear        | 41, 42 = 1 line                                                                                                                                                                                    | 11, 12, 13, 14, 15, 16, 18, 21, 22, 23, 24, 25, 26, 27, 28, 36, 37, 38, 45, 46, 47, 48 |
| <b>SMB 53C</b> | 30-39 | F | 9  | Permanent            | Upp R Cent I, Canine, P1, Upp L Cent I, Canine                                                                                             | 11, 13, 14, 21, 23                                                             | 5  | 56% | Linear & pit  | 11 = 2 lines & a group of pits, 13, 14 = 2 lines, 21 = 1 line, 23 = a group of multiple pits                                                                                                       | 15, 16, 17, 18, 24, 25, 27, 28, 31, 35, 36, 37, 38, 41, 44, 47, 48                     |
| <b>SMB 66B</b> | 30-39 | F | 17 | permanent            | Upp R P1, M2, Upp L Cent I, Canine, M2, Low L P1, Low R P1, P2                                                                             | 14, 17, 21, 23, 27, 34, 44, 45                                                 | 8  | 47% | Pits          | 14, 17, 21, 23, 27, 44 & 45 = a group of multiple pits, 34 = 1 pit                                                                                                                                 | 11 (root only), 13, 16, 18, 26, 28, 36, 37, 38, 46, 47, 48                             |
| <b>SMB 73</b>  | 30-39 | M | 19 | Permanent            | Upp R Cent I, Lat I, Canine, M1, Upp L Cent I, Canine, P2, Low L Cent I, Lat I, Canine, P1, Low R Cent I, Lat I, Canine, P1                | 11, 12, 13, 16, 21, 23, 25, 31, 32, 33, 34, 41, 42, 43, 44                     | 15 | 79% | Linear & pits | 11, 21, 31, 32, 41 & 42 = 2 lines & a group of multiple pits, 12 = 1 line, 13, 23 33 & 43 = 1 line & a group of multiple pits, 16, 44 = 1 pit & a group of multiple pits, 25 = 1 pit               | 15, 17, 18, 24, 26, 27, 36, 37, 38, 46, 47, 48                                         |
| <b>SMB 06</b>  | 40-49 | M | 24 | Permanent            | Upp R Cent I, Low L Cent I, Lat I, Low R Cent I, Lat I                                                                                     | 12, 31, 32, 41, 42                                                             | 5  | 21% | Linear        | 12 = 3 lines, 31, 32, 41, 42 = 1 line,                                                                                                                                                             | 28, 34, 35, 36, 38, 48                                                                 |
| <b>SMB 09</b>  | 40-49 | M | 22 | Permanent            | Upp R Cent I, Canine, Upp L Cent I, Lat I, Canine, Low L Lat I, Canine, Low R Canine                                                       | 12, 13, 21, 22, 23, 32, 33, 43                                                 | 8  | 36% | Linear & pit  | 12, 13, 21, 22, 23, 32, 33, 43 = 1 line                                                                                                                                                            | 11, 27, 38                                                                             |
| <b>SMB 57</b>  | 40-49 | M | 25 | Permanent            | Upp R Cent I, Lat I, Canine, P1, Upp L, M2, Low L Lat I, Canine, P2, Low R Lat I, Canine                                                   | 11, 12, 13, 14, 27, 32, 33, 35, 42, 43                                         | 10 | 40% | Linear & pit  | 11, 12, 32, 33 & 42 = 2 lines, 13 = 1 line & a group of multiple pits, 14, 27 & 35 = a group of multiple pits, 43 = 3 lines                                                                        | 25, 28                                                                                 |
| <b>SMB 72</b>  | 40-49 | M | 29 | Permanent            | Upp R Lat I, Canine, Upp L Canine, P1, Low L M3, Low R Canine, M3                                                                          | 12, 13, 23, 24, 38, 43, 48                                                     | 7  | 24% | Pits          | 12, 38, 48 = 1 pit, 13, 23, 24, 43 = a group of multiple pits (in a line)                                                                                                                          |                                                                                        |
| <b>SMB 83</b>  | 40-49 | M | 16 | Permanent            | Upp R Canine, Upp L Cent I, Canine, M2, M3, Low L                                                                                          | 13, 21, 23, 27, 28, 33, 34, 42, 43                                             | 9  | 56% | Linear & pit  | 13, 23 = 2 lines, 21, 33, 34, 42 = 1 line, 27, 28 = a group of multiple pits,                                                                                                                      | 16, 18, 26, 36, 45, 46                                                                 |

The oral health of a group of 19<sup>th</sup> Century South Australian settlers in relation to their general health and compared with that of contemporaneous samples. Gurr et al., 2023.

|                                                 |       |   |    |           |                                                                                             |                                                |     |     |               |                                                                                                |                                                                                                        |
|-------------------------------------------------|-------|---|----|-----------|---------------------------------------------------------------------------------------------|------------------------------------------------|-----|-----|---------------|------------------------------------------------------------------------------------------------|--------------------------------------------------------------------------------------------------------|
|                                                 |       |   |    |           | Canine, P1, Low R Lat I, Canine                                                             |                                                |     |     |               | 43 = 2 lines & a group of multiple pits                                                        |                                                                                                        |
| <b>SMB 85</b>                                   | 40-49 | M | 2  | Permanent | Low L Canine                                                                                | 33                                             | 1   | 50% | Linear & pit2 | 33 = 1 line & a group of multiple pits                                                         | 11, 12, 13, 14, 15, 16, 17, 18, 23, 24, 25, 26, 27, 28, 31, 35, 36, 37, 38, 41, 43, 44, 45, 46, 47, 48 |
| <b>SMB 23</b>                                   | 50-59 | M | 21 | Permanent | Upp R M2, M3, Upp L Cent I, Low L Cent I, Low R Cent I, Lat I, Canine                       | 17, 18, 21, 31, 32, 33, 41, 42, 43             | 9   | 43% | Linear & pit  | 17, 18, 21, 33, 43 = a group of multiple pits, 31, 32, 41, 42 = 1 line                         | 48                                                                                                     |
| <b>SMB 59</b>                                   | 50-59 | M | 15 | Permanent | Upp R Cent I, Lat I, Canine, Upp L Lat I, Canine, Low L P2, M3, Low R Cent I, Lat I, P1, M1 | 11, 12, 13, 21, 22, 23, 35, 38, 41, 42, 44, 46 | 12  | 80% | Linear & pit  | 11, 42 = 2 lines, 12, 13, 22, 23, 35, 38, 44, 46 = a group of multiple pits, 21 & 41 = 3 lines | 14, 15, 24, 25, 47                                                                                     |
| <b>SMB 63</b>                                   | 50-59 | M | 3  | Permanent | Low L Lat I, Canine                                                                         | 32, 43                                         | 2   | 67% | Pits          | 32 = a group of multiple pits, 43 = 1 pit                                                      | 11, 12, 14, 15, 16, 17, 21, 22, 24, 25, 26, 27, 28, 35, 36, 37, 38, 41, 42, 44, 46, 47, 48             |
| <b>SMB 68</b>                                   | 50-59 | M | 19 | Permanent | Upp R P1, Upp L, Canine, Low L P2, Low R Canine, P1, P2                                     | 14, 23, 35, 43, 44, 45                         | 6   | 42% | Pits          | 14, 23, 35, 43, 44, & 45 = a group of multiple pits                                            | 15, 16, 36, 41, 46                                                                                     |
| <b>Total number of primary teeth affected</b>   |       |   |    |           |                                                                                             |                                                | 20  |     |               |                                                                                                |                                                                                                        |
| <b>Total number of Permanent teeth affected</b> |       |   |    |           |                                                                                             |                                                | 158 |     |               |                                                                                                |                                                                                                        |
| <b>Grand Total of teeth affected</b>            |       |   |    |           |                                                                                             |                                                | 178 |     |               |                                                                                                |                                                                                                        |

**Notes:** **M** = male, **F** = female, **U** = undetermined sex. **EH** = Enamel hypoplastic defects. **Upp** = upper jaw (maxilla), **Low** = lower jaw (Mandible), **Cent.** = central, **Lat.** = lateral, **I** = incisor, **P1** = first premolar, **P2** = second premolar, **m1** = first *primary* molar, **M1** = first *permanent* molar, **m2** = second *primary* molar, **M2** = second *permanent* molar, **M3** = third permanent molar.

\*A tooth may have more than one EH defect. **AMTL** = antemortem tooth loss = evidence of healing or the alveolar bone has healed in the original position of the tooth. **FDI** = Fédération Dentaire Internationale tooth identification notation system.
