# Supplementary material for: The Oral Health of a Group of 19th Century South Australian Settlers in Relation to Their General Health and Compared with That of Contemporaneous Samples
Source: MDPI journal article supplement (doi:10.3390/dj11040099), 2023-04-07
Supplement: s1 [file s1]

The oral health of a group of 19<sup>th</sup> Century South Australian settlers in relation to their general health and compared with that of contemporaneous samples. Gurr et al., 2023.

## Supplementary Material

**Table S2. Large Volume Micro-CT.** Settings used for scanning of the dentition in situ in the dentoalveolar complex of the human skulls from the St Mary's Cemetery individuals, using the Nikon XT H 225 ST Micro-CT system. In choosing the scanning settings, the transmitted signal intensity and source power settings were considered according to guidelines (Wearne et al 2022, du Plessis et al. 2017).

| <b>Skeletal region<br/>LV Micro-CT<br/>scanned</b> | <b>St Mary's<br/>ID</b> | <b>Pixel<br/>size<br/>(<math>\mu\text{m}</math>)</b> | <b>Source<br/>voltage<br/>(kV)</b> | <b>Source<br/>Current<br/>(<math>\mu\text{A}</math>)</b> | <b>Source<br/>Power<br/>(W)</b> | <b>Rotation<br/>step</b> | <b>Exposure<br/>time<br/>(seconds)</b> | <b>Filter<br/>Type</b> | <b>Filter<br/>thickness<br/>(mm)</b> | <b>X-ray<br/>projections</b> | <b>Total<br/>acquisition<br/>time<br/>(hours/minutes)</b> |
|----------------------------------------------------|-------------------------|------------------------------------------------------|------------------------------------|----------------------------------------------------------|---------------------------------|--------------------------|----------------------------------------|------------------------|--------------------------------------|------------------------------|-----------------------------------------------------------|
| <b>Skull</b>                                       | <b>SMB 73</b>           | 60                                                   | 190                                | 220                                                      | 41                              | 360°                     | 1.42                                   | Sn                     | 0.1                                  | 3000                         | 1 hr 10 mins                                              |
|                                                    | <b>SMB 52B</b>          | 60                                                   | 190                                | 220                                                      | 41                              | 360°                     | 1.42                                   | Sn                     | 0.1                                  | 3000                         | 1 hr 10 mins                                              |
| <b>Cranium only</b>                                | <b>SMB 82</b>           | 40                                                   | 190                                | 210                                                      | 40                              | 360°                     | 1.42                                   | Sn                     | 0.1                                  | 3000                         | 1 hr 10 mins                                              |
|                                                    | <b>SMB 66B</b>          | 50                                                   | 190                                | 220                                                      | 41                              | 360°                     | 1.42                                   | Sn                     | 0.1                                  | 3000                         | 1 hr 10 mins                                              |
|                                                    | <b>SMB 58</b>           | 35                                                   | 190                                | 184                                                      | 35                              | 360°                     | 1.42                                   | Sn                     | 0.1                                  | 3000                         | 1 hr 10 mins                                              |
|                                                    | <b>SMB 4A</b>           | 55                                                   | 190                                | 220                                                      | 41                              | 360°                     | 1.42                                   | Sn                     | 0.1                                  | 3000                         | 1 hr 10 mins                                              |
| <b>Mandible only</b>                               | <b>SMB 82</b>           | 18                                                   | 190                                | 68                                                       | 12.9                            | 360°                     | 2                                      | Al                     | 0.5                                  | 3000                         | 1 hr 40 mins                                              |
|                                                    | <b>SMB 73</b>           | 13                                                   | 190                                | 68                                                       | 12.9                            | 360°                     | 2                                      | Al                     | 0.5                                  | 3000                         | 1 hr 40 mins                                              |
|                                                    | <b>SMB 66B</b>          | 13                                                   | 190                                | 68                                                       | 12.9                            | 360°                     | 2                                      | Al                     | 0.5                                  | 3000                         | 1 hr 40 mins                                              |
|                                                    | <b>SMB 58</b>           | 21                                                   | 190                                | 95                                                       | 18                              | 360°                     | 2                                      | Al                     | 0.5                                  | 3000                         | 1 hr 40 mins                                              |
|                                                    | <b>SMB 52B</b>          | 22                                                   | 190                                | 68                                                       | 12.9                            | 360°                     | 2                                      | Al                     | 0.5                                  | 3000                         | 1 hr 40 mins                                              |
|                                                    | <b>SMB 4A</b>           | 20                                                   | 190                                | 68                                                       | 12.9                            | 360°                     | 2                                      | Al                     | 0.5                                  | 3000                         | 1 hr 40 mins                                              |

The oral health of a group of 19<sup>th</sup> Century South Australian settlers in relation to their general health and compared with that of contemporaneous samples. Gurr et al., 2023.

### **References:**

- du Plessis**, A., Broeckhoven, C., Guelpa, A., le Roux, S.G., 2017. Laboratory x-ray micro-computed tomography: a user guideline for biological samples, *Gigascience* 6, 1-11.
- Wearne**, L.S., Rapagna, S., Taylor, M., Perilli, E., 2022. Micro-CT scan optimisation for mechanical loading of tibia with titanium tibial tray: A digital volume correlation zero strain error analysis, *Journal of the mechanical behavior of biomedical materials* 134, 105336-105336.
