# Supplementary material for: The Oral Health of a Group of 19th Century South Australian Settlers in Relation to Their General Health and Compared with That of Contemporaneous Samples
Source: MDPI journal article supplement (doi:10.3390/dj11040099), 2023-04-07
Supplement: s1 [file s1]

The oral health of a group of 19<sup>th</sup> Century South Australian settlers in relation to their general health and compared with that of contemporaneous samples. Gurr et al., 2023.

**Table S7a.** Summary of findings for St Mary's Cemetery adults using Molnar's (1971) categories of tooth wear.

| St Mary's<br>Burial ID | Age<br>range<br>(years) | Sex | Total<br>number of<br>permanent<br>teeth<br>present | Number<br>of<br>maxillary<br>teeth | Number<br>of<br>mandibular<br>teeth | Number<br>of teeth<br>with<br>Cat 1-3 | Number<br>of teeth<br>with<br>Cat. 4 | Number<br>of teeth<br>with<br>Cat.5 | Number<br>of teeth<br>with<br>Cat. 6 | Number<br>of teeth<br>with<br>Cat. 7 | Number<br>of teeth<br>with<br>Cat. 8 |
|------------------------|-------------------------|-----|-----------------------------------------------------|------------------------------------|-------------------------------------|---------------------------------------|--------------------------------------|-------------------------------------|--------------------------------------|--------------------------------------|--------------------------------------|
| <b>SMB 05</b>          | 20-29                   | F   | 6                                                   | 0                                  | 6                                   | 4                                     | 2                                    | 0                                   | 0                                    | 0                                    | 0                                    |
| <b>SMB 53C</b>         | 30-39                   | F   | 9                                                   | 6                                  | 3                                   | 4                                     | 2                                    | 3                                   | 0                                    | 0                                    | 0                                    |
| <b>SMB 66B</b>         | 30-39                   | F   | 17                                                  | 8                                  | 9                                   | 9                                     | 7                                    | 1                                   | 0                                    | 0                                    | 0                                    |
| <b>SMB 73</b>          | 30-39                   | M   | 19                                                  | 9                                  | 10                                  | 6                                     | 12                                   | 1                                   | 0                                    | 0                                    | 0                                    |
| <b>SMB 06</b>          | 40-49                   | M   | 25                                                  | 13                                 | 12                                  | 1                                     | 10                                   | 8                                   | 5                                    | 1                                    | 0                                    |
| <b>SMB 09</b>          | 40-49                   | M   | 22                                                  | 9                                  | 13                                  | 14                                    | 4                                    | 4                                   | 0                                    | 0                                    | 0                                    |
| <b>SMB 57</b>          | 40-49                   | M   | 25                                                  | 11                                 | 14                                  | 3                                     | 10                                   | 12                                  | 0                                    | 0                                    | 0                                    |
| <b>SMB 61</b>          | 40-49                   | F   | 6                                                   | 2                                  | 4                                   | 4                                     | 1                                    | 0                                   | 0                                    | 1                                    | 0                                    |
| <b>SMB 72</b>          | 40-49                   | M   | 30                                                  | 15                                 | 15                                  | 16                                    | 11                                   | 3                                   | 0                                    | 0                                    | 0                                    |
| <b>SMB 78</b>          | 40-49                   | F   | 4                                                   | 2                                  | 2                                   | 1                                     | 0                                    | 2                                   | 1                                    | 0                                    | 0                                    |
| <b>SMB 83</b>          | 40-49                   | M   | 15                                                  | 7                                  | 8                                   | 2                                     | 7                                    | 4                                   | 2                                    | 0                                    | 0                                    |
| <b>SMB 85</b>          | 40-49                   | M   | 2                                                   | 0                                  | 2                                   | 0                                     | 0                                    | 2                                   | 0                                    | 0                                    | 0                                    |
| <b>SMB 14</b>          | 50-59                   | M   | 2                                                   | 1                                  | 1                                   | 0                                     | 1                                    | 0                                   | 1                                    | 0                                    | 0                                    |
| <b>SMB 23</b>          | 50-59                   | M   | 21                                                  | 10                                 | 11                                  | 8                                     | 6                                    | 6                                   | 0                                    | 0                                    | 1                                    |
| <b>SMB 59</b>          | 50-59                   | M   | 16                                                  | 6                                  | 10                                  | 5                                     | 5                                    | 1                                   | 4                                    | 1                                    | 0                                    |
| <b>SMB 63</b>          | 50-59                   | M   | 3                                                   | 0                                  | 3                                   | 0                                     | 1                                    | 2                                   | 0                                    | 0                                    | 0                                    |
| <b>SMB 68</b>          | 50-59                   | M   | 19                                                  | 7                                  | 12                                  | 5                                     | 4                                    | 8                                   | 2                                    | 0                                    | 0                                    |
| <b>TOTAL</b>           |                         |     | <b>241</b>                                          | <b>106</b>                         | <b>135</b>                          | <b>82</b>                             | <b>83</b>                            | <b>57</b>                           | <b>15</b>                            | <b>3</b>                             | <b>1</b>                             |

The oral health of a group of 19<sup>th</sup> Century South Australian settlers in relation to their general health and compared with that of contemporaneous samples. Gurr et al., 2023.

**Table S7b.** Molnar's (1971) Category of tooth wear assigned to the *maxillary* dentition of the adults from the St Mary's sample.

| St Mary's<br>Burial ID | Age<br>range<br>(years) | Sex | Jaw and permanent tooth identification, including FDI numbers |                                         |                                 |                             |                             |                             |                             |                             |                                           |                                         |                                 |                             |                             |                             |                             |                             |
|------------------------|-------------------------|-----|---------------------------------------------------------------|-----------------------------------------|---------------------------------|-----------------------------|-----------------------------|-----------------------------|-----------------------------|-----------------------------|-------------------------------------------|-----------------------------------------|---------------------------------|-----------------------------|-----------------------------|-----------------------------|-----------------------------|-----------------------------|
|                        |                         |     | <b>Maxilla</b>                                                |                                         |                                 |                             |                             |                             |                             |                             |                                           |                                         |                                 |                             |                             |                             |                             |                             |
|                        |                         |     | Upp<br>R<br>Cent.<br>Incisor<br><b>11</b>                     | Upp<br>R<br>Lat<br>Incisor<br><b>12</b> | Upp<br>R<br>Canine<br><b>13</b> | Upp<br>R<br>P1<br><b>14</b> | Upp<br>R<br>P2<br><b>15</b> | Upp<br>R<br>M1<br><b>16</b> | Upp<br>R<br>M2<br><b>17</b> | Upp<br>R<br>M3<br><b>18</b> | Upp<br>L<br>Cent.<br>Incisor<br><b>21</b> | Upp<br>L<br>Lat<br>Incisor<br><b>22</b> | Upp<br>L<br>Canine<br><b>23</b> | Upp<br>L<br>P1<br><b>24</b> | Upp<br>L<br>P2<br><b>25</b> | Upp<br>L<br>M1<br><b>26</b> | Upp<br>L<br>M2<br><b>27</b> | Upp<br>L<br>M3<br><b>28</b> |
| <b>SMB 05</b>          | 20-29                   | F   | N/A                                                           | N/A                                     | N/A                             | N/A                         | N/A                         | N/A                         | N/A                         | N/A                         | N/A                                       | N/A                                     | N/A                             | N/A                         | N/A                         | N/A                         | N/A                         | N/A                         |
| <b>SMB 53C</b>         | 30-39                   | F   | 5                                                             | N/A                                     | 4                               | N/A                         | N/A                         | 5                           | N/A                         | N/A                         | 5                                         | N/A                                     | 2                               | 2                           | N/A                         | N/A                         | N/A                         | N/A                         |
| <b>SMB 66B</b>         | 30-39                   | F   | N/A                                                           | 3                                       | N/A                             | 3                           | 2                           | N/A                         | 2                           | N/A                         | 5                                         | 3                                       | 3                               | N/A                         | N/A                         | N/A                         | 4                           | N/A                         |
| <b>SMB 73</b>          | 30-39                   | M   | 4                                                             | 4                                       | 3                               | N/A                         | N/A                         | 2                           | N/A                         | N/A                         | 4                                         | 4                                       | 4                               | N/A                         | 4                           | N/A                         | N/A                         | 2                           |
| <b>SMB 06</b>          | 40-49                   | M   | 5                                                             | 4                                       | 3                               | 5                           | 5                           | 6                           | 6                           | N/A                         | N/A                                       | 4                                       | 5                               | 4                           | 4                           | 6                           | 6                           | N/A                         |
| <b>SMB 09</b>          | 40-49                   | M   | N/A                                                           | 5                                       | 4                               | N/A                         | N/A                         | 2                           | N/A                         | N/A                         | 5                                         | 4                                       | 3                               | 3                           | 3                           | 3                           | N/A                         | N/A                         |
| <b>SMB 57</b>          | 40-49                   | M   | 5                                                             | 5                                       | 5                               | 4                           | 4                           | 4                           | 5                           | N/A                         | N/A                                       | 5                                       | N/A                             | 3                           | N/A                         | 4                           | 5                           | N/A                         |
| <b>SMB 61</b>          | 40-49                   | F   | N/A                                                           | N/A                                     | N/A                             | 7                           | N/A                         | N/A                         | N/A                         | N/A                         | N/A                                       | N/A                                     | N/A                             | N/A                         | 1                           | N/A                         | N/A                         | N/A                         |
| <b>SMB 72</b>          | 40-49                   | M   | 5                                                             | 3                                       | 4                               | 2                           | 2                           | 3                           | 4                           | 4                           | 5                                         | 4                                       | 4                               | 3                           | 3                           | 4                           | 3                           | N/A                         |
| <b>SMB 78</b>          | 40-49                   | F   | N/A                                                           | N/A                                     | 5                               | 2                           | N/A                         | N/A                         | N/A                         | N/A                         | N/A                                       | N/A                                     | N/A                             | N/A                         | N/A                         | N/A                         | N/A                         | N/A                         |
| <b>SMB 83</b>          | 40-49                   | M   | N/A                                                           | N/A                                     | 5                               | 4                           | N/A                         | N/A                         | N/A                         | 5                           | 4                                         | N/A                                     | 4                               | 3                           | N/A                         | N/A                         | 4                           | 3                           |
| <b>SMB 85</b>          | 40-49                   | M   | N/A                                                           | N/A                                     | N/A                             | N/A                         | N/A                         | N/A                         | N/A                         | N/A                         | N/A                                       | N/A                                     | N/A                             | N/A                         | N/A                         | N/A                         | N/A                         | N/A                         |
| <b>SMB 14</b>          | 50-59                   | M   | N/A                                                           | N/A                                     | N/A                             | N/A                         | N/A                         | N/A                         | N/A                         | N/A                         | N/A                                       | N/A                                     | 6                               | N/A                         | N/A                         | N/A                         | N/A                         | N/A                         |
| <b>SMB 23</b>          | 50-59                   | M   | N/A                                                           | N/A                                     | 5                               | 4                           | 2                           | N/A                         | 2                           | 2                           | 5                                         | 5                                       | 5                               | N/A                         | N/A                         | N/A                         | 2                           | 8                           |
| <b>SMB 59</b>          | 50-59                   | M   | 4                                                             | 4                                       | 5                               | N/A                         | N/A                         | N/A                         | N/A                         | N/A                         | 4                                         | 4                                       | 6                               | N/A                         | N/A                         | N/A                         | N/A                         | N/A                         |
| <b>SMB 63</b>          | 50-59                   | M   | N/A                                                           | N/A                                     | N/A                             | N/A                         | N/A                         | N/A                         | N/A                         | N/A                         | N/A                                       | N/A                                     | N/A                             | N/A                         | N/A                         | N/A                         | N/A                         | N/A                         |
| <b>SMB 68</b>          | 50-59                   | M   | N/A                                                           | N/A                                     | 5                               | 5                           | N/A                         | N/A                         | 6                           | 6                           | N/A                                       | N/A                                     | 5                               | 4                           | 4                           | N/A                         | N/A                         | N/A                         |

The oral health of a group of 19<sup>th</sup> Century South Australian settlers in relation to their general health and compared with that of contemporaneous samples. Gurr et al., 2023.

**Table S7c.** Molnar's (1971) Category of tooth wear assigned to the *mandibular* dentition of the adults from the St Mary's sample.

| St Mary's<br>Burial ID | Age<br>range<br>(years) | Sex | Jaw and permanent tooth identification, including FDI numbers |                                  |                          |                      |                      |                      |                      |                      |                                    |                                  |                          |                      |                      |                      |                      |                      |
|------------------------|-------------------------|-----|---------------------------------------------------------------|----------------------------------|--------------------------|----------------------|----------------------|----------------------|----------------------|----------------------|------------------------------------|----------------------------------|--------------------------|----------------------|----------------------|----------------------|----------------------|----------------------|
|                        |                         |     | <b>Mandible</b>                                               |                                  |                          |                      |                      |                      |                      |                      |                                    |                                  |                          |                      |                      |                      |                      |                      |
|                        |                         |     | Low<br>L<br>Cent<br>Incisor<br>31                             | Low<br>L<br>Lat<br>Incisor<br>32 | Low<br>L<br>Canine<br>33 | Low<br>L<br>P1<br>34 | Low<br>L<br>P2<br>35 | Low<br>L<br>M1<br>36 | Low<br>L<br>M2<br>37 | Low<br>L<br>M3<br>38 | Low<br>R<br>Cent.<br>Incisor<br>41 | Low<br>R<br>Lat<br>Incisor<br>42 | Low<br>R<br>Canine<br>43 | Low<br>R<br>P1<br>44 | Low<br>R<br>P2<br>45 | Low<br>R<br>M1<br>46 | Low<br>R<br>M2<br>47 | Low<br>R<br>M3<br>48 |
|                        |                         |     |                                                               |                                  |                          |                      |                      |                      |                      |                      |                                    |                                  |                          |                      |                      |                      |                      |                      |
| <b>SMB 05</b>          | 20-29                   | F   | 4                                                             | N/A                              | 1                        | 2                    | N/A                  | N/A                  | N/A                  | N/A                  | 3                                  | 4                                | N/A                      | 2                    | N/A                  | N/A                  | N/A                  | N/A                  |
| <b>SMB 53C</b>         | 30-39                   | F   | N/A                                                           | N/A                              | N/A                      | 3                    | N/A                  | N/A                  | N/A                  | N/A                  | N/A                                | 4                                | N/A                      | N/A                  | N/A                  | 2                    | N/A                  | N/A                  |
| <b>SMB 66B</b>         | 30-39                   | F   | 4                                                             | 4                                | 4                        | 3                    | N/A                  | N/A                  | N/A                  | N/A                  | 4                                  | 4                                | 4                        | 3                    | 3                    | N/A                  | N/A                  | N/A                  |
| <b>SMB 73</b>          | 30-39                   | M   | 4                                                             | 4                                | 5                        | 2                    | 4                    | N/A                  | N/A                  | N/A                  | 4                                  | 4                                | 3                        | 3                    | 4                    | N/A                  | N/A                  | N/A                  |
| <b>SMB 06</b>          | 40-49                   | M   | 5                                                             | 4                                | 4                        | 5                    | N/A                  | N/A                  | 7                    | N/A                  | 4                                  | 4                                | 5                        | 4                    | 4                    | 6                    | 5                    | N/A                  |
| <b>SMB 09</b>          | 40-49                   | M   | 5                                                             | 5                                | 3                        | 3                    | 3                    | 4                    | 4                    | N/A                  | N/A                                | N/A                              | 3                        | 2                    | 2                    | 3                    | 3                    | 3                    |
| <b>SMB 57</b>          | 40-49                   | M   | N/A                                                           | 5                                | 5                        | 5                    | 4                    | 4                    | 4                    | N/A                  | 5                                  | 5                                | 5                        | 4                    | 3                    | 4                    | 4                    | 3                    |
| <b>SMB 61</b>          | 40-49                   | F   | N/A                                                           | 3                                | 4                        | N/A                  | 2                    | N/A                  | N/A                  | N/A                  | N/A                                | 2                                | N/A                      | N/A                  | N/A                  | N/A                  | N/A                  | N/A                  |
| <b>SMB 72</b>          | 50-59                   | M   | 4                                                             | 4                                | 5                        | 2                    | 2                    | 3                    | 3                    | 2                    | N/A                                | 4                                | 4                        | 2                    | 2                    | 4                    | 3                    | 2                    |
| <b>SMB 78</b>          | 40-49                   | F   | N/A                                                           | 5                                | 6                        | N/A                  | N/A                  | N/A                  | N/A                  | N/A                  | N/A                                | N/A                              | N/A                      | N/A                  | N/A                  | N/A                  | N/A                  | N/A                  |
| <b>SMB 83</b>          | 40-49                   | M   | N/A                                                           | N/A                              | 5                        | 5                    | N/A                  | N/A                  | 5                    | 6                    | N/A                                | 4                                | 4                        | N/A                  | N/A                  | N/A                  | 4                    | 6                    |
| <b>SMB 85</b>          | 40-49                   | M   | N/A                                                           | N/A                              | 5                        | 5                    | N/A                  | N/A                  | N/A                  | N/A                  | N/A                                | N/A                              | N/A                      | N/A                  | N/A                  | N/A                  | N/A                  | N/A                  |
| <b>SMB 14</b>          | 50-59                   | M   | N/A                                                           | N/A                              | N/A                      | N/A                  | 4                    | N/A                  | N/A                  | N/A                  | N/A                                | N/A                              | N/A                      | N/A                  | N/A                  | N/A                  | N/A                  | N/A                  |
| <b>SMB 23</b>          | 50-59                   | M   | 5                                                             | 5                                | 4                        | 4                    | 2                    | N/A                  | 2                    | N/A                  | 4                                  | 4                                | 4                        | 3                    | N/A                  | N/A                  | 2                    | N/A                  |
| <b>SMB 59</b>          | 50-59                   | M   | N/A                                                           | N/A                              | N/A                      | 6                    | 7                    | 6                    | N/A                  | 2                    | 3                                  | 3                                | N/A                      | 6                    | 4                    | 2                    | N/A                  | 2                    |
| <b>SMB 63</b>          | 50-59                   | M   | N/A                                                           | N/A                              | 5                        | 5                    | N/A                  | N/A                  | N/A                  | N/A                  | N/A                                | N/A                              | 4                        | N/A                  | N/A                  | N/A                  | N/A                  | N/A                  |
| <b>SMB 68</b>          | 50-59                   | M   | 5                                                             | 4                                | N/A                      | 3                    | 3                    | N/A                  | 3                    | 3                    | N/A                                | 5                                | 4                        | 5                    | 2                    | N/A                  | 5                    | 5                    |

**Notes:** M = male, F = female. A category was assigned to each tooth following **Molnar's (1971) categories of occlusal tooth wear**. A higher category implies more tooth wear. Category 1 =1, Category 2 =2, Category 3 =3, Category 4 =4, Category 5 =5, Category 6 =6, Category 7 =7, Category 8 =8. **Upp** = upper, **Low** = lower, **Cent.** = central, **Lat.** = lateral, **P1** = first premolar, **P2** = second premolar, **M1** = first permanent molar, **M2** = second permanent molar, **M3** = third permanent molar. **N/A** = not applicable – tooth either lost antemortem or post-mortem and could not be observed.
