# Supplementary material for: The Oral Health of a Group of 19th Century South Australian Settlers in Relation to Their General Health and Compared with That of Contemporaneous Samples
Source: MDPI journal article supplement (doi:10.3390/dj11040099), 2023-04-07
Supplement: s1 [file s1]

The oral health of a group of 19<sup>th</sup> Century South Australian settlers in relation to their general health and compared with that of contemporaneous samples. Gurr et al., 2023.

**Table S3.** Small Volume Micro-CT scanning of individual teeth associated with skulls from individuals of the St Mary's Cemetery sample. Additional SV Micro-CT scan settings information on page 2.

| <b>St Mary's ID</b> | <b>Dental age range</b><br>(years & months) | <b>Chronological Age range</b><br>(years) | <b>Sex</b> | <b>Permanent or <i>primary</i> Tooth Type</b><br><i>with the FDI notation number</i>                                                                                                                                                                    | <b>Total number of teeth SV Micro-CT scanned</b> |
|---------------------|---------------------------------------------|-------------------------------------------|------------|---------------------------------------------------------------------------------------------------------------------------------------------------------------------------------------------------------------------------------------------------------|--------------------------------------------------|
| <b>SMB 27B</b>      | 1-1.5<br>(+/- 3 mths)                       | 0-2                                       | U          | <i>primary</i> Low L M1 (74)                                                                                                                                                                                                                            | <b>1</b>                                         |
| <b>SMB 58</b>       | 1-1.5<br>(+/- 3 mths)                       | 0-2                                       | U          | <i>primary</i> Low L m1 (74)                                                                                                                                                                                                                            | <b>1</b>                                         |
| <b>SMB 82</b>       | 1-1.5<br>(+/- 3 mths)                       | 0-2                                       | U          | <i>primary</i> Upp R *cent incisor (51)<br><i>primary</i> Upp R lat incisor (52)<br><i>primary</i> Upp L cent incisor (61)<br><i>primary</i> Upp L lat incisor (62)<br><i>primary</i> Low R cent incisor (71)<br><i>primary</i> Low L cent incisor (81) | <b>6</b>                                         |
| <b>SMB 4A</b>       | 3.5-4.5<br>(+/- 3 mths)                     | 2-5                                       | U          | <i>primary</i> Upp R Lat Incisor (52)<br><i>primary</i> Upp R Canine (53)<br><i>primary</i> Upp L Cent Incisor (61)<br><i>primary</i> Upp L Canine (63)                                                                                                 | <b>4</b>                                         |
| <b>SMB 19</b>       | 7.5- 8.5<br>(+/- 6 mths)                    | 6-10                                      | U          | Permanent Low L M1 (36)                                                                                                                                                                                                                                 | <b>1</b>                                         |
| <b>SMB 70</b>       | 11.5-12.5<br>(+/- 6 mths)                   | 8-9                                       | U          | <i>primary</i> Low R m1 (74)<br>Permanent Upp R M1 (16)                                                                                                                                                                                                 | <b>2</b>                                         |
| <b>SMB 52B</b>      | 10.5-11.5<br>(+/- 6 mths)                   | 10-14                                     | U          | <i>primary</i> Low L m2 (75)<br>Permanent Upp R Cent Incisor (11)<br>Permanent Upp R lat Incisor (12)                                                                                                                                                   | <b>3</b>                                         |
| <b>SMB 51</b>       | 10-11<br>(+/- 6 mths)                       | 10-14                                     | U          | Permanent Low R M1 (46)                                                                                                                                                                                                                                 | <b>1</b>                                         |
| <b>SMB 28</b>       | 12-15<br>(+/- 6 mths)                       | 12-16                                     | U          | Permanent Low L M1 (36)                                                                                                                                                                                                                                 | <b>1</b>                                         |
| <b>SMB 79</b>       | 15.5-16.5<br>(+/- 6 mths)                   | 16-18                                     | U<br>(F?)  | Permanent Upp L M1 (26)                                                                                                                                                                                                                                 | <b>1</b>                                         |
| <b>SMB 05</b>       | Over 23.5                                   | 20-29                                     | F          | Permanent Low R Canine (43)                                                                                                                                                                                                                             | <b>1</b>                                         |
| <b>SMB 53C</b>      | Over 23.5                                   | 30-39                                     | F          | Permanent Upp R M1 (16)                                                                                                                                                                                                                                 | <b>1</b>                                         |
| <b>SMB 66B</b>      | Over 23.5                                   | 30-39                                     | F          | Permanent Upp R lat incisor (12)<br>Permanent Upp R P1 (14)<br>Permanent Upp R P2 (15)<br>Permanent Upp R M2 (17)<br>Permanent Upp L canine (23)                                                                                                        | <b>5</b>                                         |
| <b>SMB 73</b>       | Over 23.5                                   | 30-39                                     | M          | Permanent Upp R P1 (14)<br>Permanent Upp R Cent Incisor (11)<br>Permanent Upp R M1 (16)<br>Permanent Upp L Canine (23)<br>Permanent Upp L P2 (25)<br>Permanent Upp L M3 (28)                                                                            | <b>6</b>                                         |
| <b>SMB 6</b>        | Over 23.5                                   | 40-49                                     | M          | Permanent Upp L Canine (23)                                                                                                                                                                                                                             | <b>1</b>                                         |
| <b>SMB 72</b>       | Over 23.5                                   | 40-49                                     | M          | Permanent Low R M2 (47)                                                                                                                                                                                                                                 | <b>1</b>                                         |
| <b>SMB 85</b>       | Over 23.5                                   | 40-49                                     | M          | Permanent Low L canine (33)                                                                                                                                                                                                                             | <b>1</b>                                         |
| <b>SMB 23</b>       | Over 23.5                                   | 50-59                                     | M          | Permanent Low R M2 (47)                                                                                                                                                                                                                                 | <b>1</b>                                         |
| <b>SMB 63</b>       | Over 23.5                                   | 50-59                                     | M          | Permanent Low R Lat Incisor (42)                                                                                                                                                                                                                        | <b>1</b>                                         |
| <b>SMB 68</b>       | Over 23.5                                   | 50-59                                     | M          | Permanent Low R M3 (48)                                                                                                                                                                                                                                 | <b>1</b>                                         |
| <b>SMB 83</b>       | Over 23.5                                   | 50- 59                                    | M          | Permanent Upp R M3 (18)                                                                                                                                                                                                                                 | <b>1</b>                                         |
|                     |                                             |                                           |            |                                                                                                                                                                                                                                                         |                                                  |
|                     |                                             |                                           |            | Total number of teeth SV Micro-CT scanned:                                                                                                                                                                                                              | <b>41</b>                                        |

The oral health of a group of 19<sup>th</sup> Century South Australian settlers in relation to their general health and compared with that of contemporaneous samples. Gurr et al., 2023.

**Table S3 Notes:** M= male, F= female, U= undetermined sex, Low = lower/ mandibular tooth type, Upp = upper/ maxillary tooth type, L=left, R=right, Cent. /\*cent. = central, (\* lower case text denotes primary dentition, capitalised text denotes permanent teeth), Lat = lateral, P1 or P2 = first or second premolar, M1, M2 or M3 = first, second or third molar.

### **SV Micro-CT scan settings information:**

Equipment: Bruker SkyScan 1276 (Bruker, 2022)

The desktop SV Micro-CT scanner was set at source voltage of 100 kV, source current of 200  $\mu$ A, and camera binning of 4032 x 2688, with an aluminium and copper filter. The Nrecon software (Bruker, 2022), was used for the reconstruction of the scan data sets.

### **Reference:**

**Bruker**, 2022. Position, Scan, Reconstruct and Analyze, Bruker. Micro Photonics Inc, 2020. Micro-CT Software: NRecon Reconstruction Software: Fast micro-CT reconstruction software., Micro Photonics Inc.
