# Supplementary material for: The Oral Health of a Group of 19th Century South Australian Settlers in Relation to Their General Health and Compared with That of Contemporaneous Samples
Source: MDPI journal article supplement (doi:10.3390/dj11040099), 2023-04-07
Supplement: s1 [file s1]

The oral health of a group of 19<sup>th</sup> Century South Australian settlers in relation to their general health and compared with that of contemporaneous samples. Gurr et al., 2023.

**Supplementary Material Table S1.** St Mary's Cemetery - Dental inventory.

| <b>St Mary's Burial I/D</b> | <b>Sex</b> | <b>†Dental age range</b><br>(months/years)<br>London Atlas of human tooth development and eruption (AlQahtanti et al., 2010) | <b>Skeletal age range</b><br>(years)<br>(Anson, 2004) | <b>Number of primary and/or permanent teeth present</b> | <b>Dental Inventory</b><br>Tooth type present.<br>*FDI notation number/s                               |
|-----------------------------|------------|------------------------------------------------------------------------------------------------------------------------------|-------------------------------------------------------|---------------------------------------------------------|--------------------------------------------------------------------------------------------------------|
| <b>SMB 66 A</b>             | U          | 7 mths-1<br>(+/- 3 mths)                                                                                                     | 0-2                                                   | 6 <i>primary</i>                                        | 51, 52, 61, 62, 71, 81                                                                                 |
| <b>SMB 40</b>               | U          | 10 mths-1<br>(+/- 3 mths)                                                                                                    | 0-2                                                   | 6 <i>primary</i>                                        | 51, 61, 62, 71, 81, 82                                                                                 |
| <b>SMB 32</b>               | U          | 10.5 mths-1<br>(+/- 3 months)                                                                                                | 0-2                                                   | 8 <i>primary</i>                                        | 51, 52, 61, 62, 71, 72, 81,82                                                                          |
| <b>SMB 41</b>               | U          | 1-1.5<br>(+/- 3 mths)                                                                                                        | 0-2                                                   | 5 <i>primary</i>                                        | 54, 62, 64, 71, 81                                                                                     |
| <b>SMB 08</b>               | U          | 1-1.5<br>(+/- 3 mths)                                                                                                        | 0-2                                                   | 8 <i>primary</i>                                        | 51, 54, 61, 64, 71, 81, 82, 84                                                                         |
| <b>SMB 62</b>               | U          | 1-1.5<br>(+/- 3 mths)                                                                                                        | 0-2                                                   | 10 <i>primary</i>                                       | 51, 52, 61, 64, 71, 72, 74, 81, 82, 84                                                                 |
| <b>SMB 82</b>               | U          | 1-1.5<br>(+/- 3 mths)                                                                                                        | 0-2                                                   | 9 <i>primary</i>                                        | 51, 52, 54, 61, 62, 71, 74, 81, 84                                                                     |
| <b>SMB 24</b>               | U          | 1-1.5<br>(+/- 3 mths)                                                                                                        | 0-2                                                   | 9 <i>primary</i>                                        | 51, 52, 54, 61, 62, 64, 74, 82, 84                                                                     |
| <b>SMB 27 B</b>             | U          | 1-1.5<br>(+/- 3 mths)                                                                                                        | 0-2                                                   | 10 <i>primary</i>                                       | 51, 52, 54, 61, 71, 72, 74, 81, 82, 84                                                                 |
| <b>SMB 58</b>               | U          | 1-1.5<br>(+/- 3 mths)                                                                                                        | 0-2                                                   | 11 <i>primary</i>                                       | 51, 52, 61, 62, 64, 71, 72, 74, 81, 82, 84                                                             |
| <b>SMB 18</b>               | U          | 1-1.5<br>(+/- 3 mths)                                                                                                        | 0-2                                                   | 1 <i>primary</i>                                        | 74                                                                                                     |
| <b>SMB 11</b>               | U          | 2-2.5<br>(+/- 3 mths)                                                                                                        | 0-2                                                   | 19 <i>primary</i>                                       | 51, 52, 53, 54, 55, 61, 62, 63, 64, 71, 72, 73, 74, 75, 81, 82, 83, 84, 85                             |
| <b>SMB 31</b>               | U          | 3-3.5<br>(+/- 6 mths)                                                                                                        | 3-5                                                   | 17 <i>primary</i>                                       | 51, 53, 54, 55, 63, 64, 65, 71, 72, 73, 74, 75, 81, 82, 83, 84, 85                                     |
| <b>SMB 04A</b>              | U          | 3.5-4.5<br>(+/- 6 mths)                                                                                                      | 3-5                                                   | 19 <i>primary</i>                                       | 51, 52, 53, 54, 55, 61, 62, 63, 64, 71, 72, 73, 74, 75, 81, 82, 83, 84, 85                             |
| <b>SMB 75</b>               | U          | 5-6<br>(+/-1 yr)                                                                                                             | 6-9                                                   | 14 <i>primary</i>                                       | 54, 55, 62, 63, 64, 65, 72, 73, 74, 75, 81, 83, 84, 85                                                 |
| <b>SMB 35</b>               | U          | 6-7 (+/-1 yr)                                                                                                                | 6-9                                                   | 11 <i>primary</i>                                       | 51, 52, 54, 63, 64, 65, 73, 74, 75, 84, 85                                                             |
| <b>SMB 19</b>               | U          | 7.5-8.5<br>(+/-1 yr)                                                                                                         | 6-9                                                   | 7 <i>primary</i><br>15 permanent                        | 11, 12, 13, 14, 15, 16, 21, 22, 24, 65, 26, 32, 73, 74, 75, 36,41, 42, 83, 84, 85, 46,                 |
| <b>SMB 70</b>               | U          | 11.5-12.5<br>(+/-1 yr)                                                                                                       | 6-9                                                   | 2 <i>primary</i><br>6 permanent                         | 53, 14, 15, 21, 63, 24, 25, 26                                                                         |
| <b>SMB 52 B</b>             | U          | 10.5-11.5<br>(+/-1 yr)                                                                                                       | 10-15                                                 | 2 <i>primary</i><br>16 permanent                        | 11, 12, 13, 16, 21, 22, 23, 26, 31, 32, 33, 75, 36, 41, 42, 43, 85, 46                                 |
| <b>SMB 51</b>               | U          | 10-11<br>(+/-1 yr)                                                                                                           | 10-15                                                 | 1 <i>primary</i><br>15 permanent                        | 12, 13, 14, 15, 16, 22, 23, 24, 25, 26, 31, 34, 36, 41, 42, 84,                                        |
| <b>SMB 28</b>               | F          | 15.5-16.5<br>(+/-1 yr)                                                                                                       | 10-15                                                 | 26 permanent                                            | 11, 12, 14, 15, 16, 17, 22, 23, 24, 25, 26, 27, 31, 32, 33, 34, 35, 36, 37, 41, 42, 43, 44, 45, 46, 47 |
| <b>SMB 79</b>               | U          | 15.5-16.5<br>(+/-1 yr)                                                                                                       | 16-19                                                 | 25 permanent                                            | 11, 13, 14, 15, 17, 21, 22, 23, 24, 25, 26, 27, 31, 32, 33, 34, 35, 37, 41, 42, 43, 44, 45, 46, 47     |
| <b>SMB 05</b>               | F          | Over 23.5                                                                                                                    | 20-29                                                 | 6 permanent                                             | 32, 35, 41, 42,43, 44,                                                                                 |
| <b>SMB 53 C</b>             | F          | Over 23.5                                                                                                                    | 30-39                                                 | 9 permanent                                             | 11, 13, 14, 21, 23, 26, 34, 42, 46                                                                     |
| <b>SMB 66 B</b>             | F          | Over 23.5                                                                                                                    | 30-39                                                 | 17 permanent                                            | 12, 14, 15, 17, 21, 22, 23, 27, 31, 32, 33, 34, 41, 42, 43, 44, 45                                     |
| <b>SMB 73</b>               | M          | Over 23.5                                                                                                                    | 30-39                                                 | 19 permanent                                            | 11, 12, 13, 16, 21, 22, 23, 25, 28, 31, 32, 33, 34, 35, 41, 42, 43, 44, 45                             |

The oral health of a group of 19<sup>th</sup> Century South Australian settlers in relation to their general health and compared with that of contemporaneous samples. Gurr et al., 2023.

|                                                 |   |           |       |              |                                                                                                                    |
|-------------------------------------------------|---|-----------|-------|--------------|--------------------------------------------------------------------------------------------------------------------|
| <b>SMB 06</b>                                   | M | Over 23.5 | 40-49 | 24 permanent | 11, 12, 13, 14, 15, 16, 17, 22, 23, 24, 25, 26, 27, 31, 32, 33, 37, 41, 42, 43, 44, 45, 46, 47                     |
| <b>SMB 09</b>                                   | M | Over 23.5 | 40-49 | 22 permanent | 12, 13, 16, 21, 22, 23, 24, 25, 26, 31, 32, 33, 34, 35, 36, 37, 43, 44, 45, 46, 47, 48                             |
| <b>SMB 57</b>                                   | M | Over 23.5 | 40-49 | 25 permanent | 11, 12, 13, 14, 15, 16, 17, 18, 22, 26, 27, 32, 33, 34, 35, 36, 37, 41, 42, 43, 44, 45, 46, 47, 48,                |
| <b>SMB 61</b>                                   | F | Over 23.5 | 40-49 | 7 permanent  | 25, 32, 33, 35, 41, 42, 44                                                                                         |
| <b>SMB 72</b>                                   | M | Over 23.5 | 40-49 | 29 permanent | 11, 12, 13, 14, 15, 16, 17, 18, 21, 22, 23, 24, 25, 26, 27, 32, 33, 34, 35, 36, 37, 38, 42, 43, 44, 45, 46, 47, 48 |
| <b>SMB 78</b>                                   | M | Over 23.5 | 40-49 | 4 permanent  | 13, 14, 34, 35                                                                                                     |
| <b>SMB 83</b>                                   | M | Over 23.5 | 40-49 | 16 permanent | 13, 14, 17, 21, 23, 24, 27, 28, 33, 34, 37, 38, 42, 43, 47, 48                                                     |
| <b>SMB 85</b>                                   | M | Over 23.5 | 40-49 | 2 permanent  | 33, 34                                                                                                             |
| <b>SMB 14</b>                                   | M | Over 23.5 | 50-59 | 2 permanent  | 23, 35                                                                                                             |
| <b>SMB 23</b>                                   | M | Over 23.5 | 50-59 | 21 permanent | 13, 14, 15, 17, 18, 21, 22, 23, 27, 28, 31, 32, 33, 34, 35, 37, 41, 42, 43, 44, 47                                 |
| <b>SMB 59</b>                                   | M | Over 23.5 | 50-59 | 15 permanent | 11, 12, 13, 21, 22, 23, 34, 35, 37, 38, 41, 42, 44, 46, 48                                                         |
| <b>SMB 63</b>                                   | M | Over 23.5 | 50-59 | 3 permanent  | 33, 34, 43                                                                                                         |
| <b>SMB 68</b>                                   | M | Over 23.5 | 50-59 | 19 permanent | 13, 14, 17, 18, 23, 24, 25, 31, 32, 34, 35, 37, 38, 42, 43, 44, 45, 47, 48                                         |
| <b>SMB 84</b>                                   | F | Over 23.5 | 50-59 | 0            | N/A                                                                                                                |
|                                                 |   |           |       |              |                                                                                                                    |
| <b>Total number of primary teeth present:</b>   |   |           |       | <b>175</b>   |                                                                                                                    |
| <b>Total number of Permanent teeth present:</b> |   |           |       | <b>343</b>   |                                                                                                                    |
| <b>Grand Total of all tooth types present:</b>  |   |           |       | <b>518</b>   |                                                                                                                    |

**Notes:** F= Female, M= male, U= undetermined. † Dental age range - “Over 23.5 years”= Estimation of dental age range is based on development and when this is complete. \* FDI = Fédération Dentaire Internationale tooth identification notation system

#### References:

**Anson, T.J.**, 2004. The bioarchaeology of the St. Mary's free ground burials: reconstruction of colonial South Australian lifeways, Thesis (Ph.D.)-University of Adelaide, Dept. of Anatomical Sciences, 2004.  
**AlQahtani, S.J.**, Hector, M.P., Liversidge, H.M., 2010. Brief communication: The London atlas of human tooth development and eruption, American Journal of Physical Anthropology 142, 481-490.  
**FDI World dental Federation**, 2022. FDI Two-Digit Notation, FDI World Dental Federation, France.
