# Supplementary material for: The Oral Health of a Group of 19th Century South Australian Settlers in Relation to Their General Health and Compared with That of Contemporaneous Samples
Source: MDPI journal article supplement (doi:10.3390/dj11040099), 2023-04-07
Supplement: s1 [file s1]

The oral health of a group of 19<sup>th</sup> Century South Australian settlers in relation to their general health and compared with that of contemporaneous samples. Gurr et al., 2023.

**Table S6.** Adults of St Mary's Cemetery sample. Assessment of the functional age of each molar and the predicted age of the subject based on tooth wear scores set out by **Miles (1962)**. \*Notes for abbreviations follow this table.

| St Mary's ID | Age range (skeletal /eruption findings) (years) | Miles (1962) tooth wear (years) | Jaw and tooth identification, including FDI notation numbers: |          |          |          |          |          |          |          |             |          |          |             |
|--------------|-------------------------------------------------|---------------------------------|---------------------------------------------------------------|----------|----------|----------|----------|----------|----------|----------|-------------|----------|----------|-------------|
|              |                                                 |                                 | MAXILLA                                                       |          |          |          |          |          | MANDIBLE |          |             |          |          |             |
|              |                                                 |                                 | Upp R M1                                                      | Upp R M2 | Upp R M3 | Upp L M1 | Upp L M2 | Upp L M3 | Low L M1 | Low L M2 | Low L M3    | Low R M1 | Low R M2 | Low R M3    |
|              |                                                 |                                 | 16                                                            | 17       | 18       | 26       | 27       | 28       | 36       | 37       | 38          | 46       | 47       | 48          |
| SMB 53C      | 30-39                                           | Functional age of teeth         | 30                                                            | AMTL        | 24       | AMTL     | AMTL        |
|              |                                                 | Predicted age of subject        | 36                                                            | n/a         | 30       | n/a      | n/a         |
| SMB 66B      | 30-39                                           | Functional age                  | AMTL                                                          | 7        | AMTL     | AMTL     | 12       | AMTL     | AMTL     | AMTL     | AMTL        | AMTL     | AMTL     | AMTL        |
|              |                                                 | Predicted age                   | n/a                                                           | 18       | n/a      | n/a      | 26       | n/a      | n/a      | n/a      | n/a         | n/a      | n/a      | n/a         |
| SMB 73       | 30-39                                           | Functional age                  | 12                                                            | AMTL     | AMTL     | AMTL     | AMTL     | 7        | AMTL     | AMTL     | AMTL        | AMTL     | AMTL     | AMTL        |
|              |                                                 | Predicted age                   | 18                                                            | n/a      | n/a      | n/a      | n/a      | 24       | n/a      | n/a      | n/a         | n/a      | n/a      | n/a         |
| SMB 06       | 40-49                                           | Functional age                  | 30                                                            | 13       | AMTL     | 36       | 32       | PMTL     | AMTL     | 28       | Not erupted | 36       | 20       | Not erupted |
|              |                                                 | Predicted age                   | 36                                                            | 27       | n/a      | 42       | 45       | n/a      | n/a      | 40       | n/a         | 42       | 31       | n/a         |
| SMB 09       | 40-49                                           | Functional age                  | 18                                                            | PMTL     | PMTL     | 12       | PMTL     | PMTL     | 15       | 7        | AMTL        | 12       | 6.5      | 7           |
|              |                                                 | Predicted age                   | 24                                                            | n/a      | n/a      | 18       | n/a      | n/a      | 21       | 19       | n/a         | 18       | 18       | 25          |
| SMB 57       | 40-49                                           | Functional age                  | 27                                                            | 25       | PMTL     | 24       | 25       | AMTL     | 16       | 16       | PMTL        | 23       | 20       | 7           |
|              |                                                 | Predicted age                   | 35                                                            | 35       | n/a      | 30       | 35       | n/a      | 22       | 28       | n/a         | 30       | 32       | 25          |
| SMB 72       | 40-49                                           | Functional age                  | 12                                                            | 5        | 14       | 12       | 5        | AMTL     | 12       | 16       | 10          | 12       | 7        | 7           |
|              |                                                 | Predicted age                   | 18                                                            | 17       | 26       | 18       | 17       | n/a      | 18       | 27       | 25          | 18       | 18       | 24          |
| SMB 83       | 40-49                                           | Functional age                  | AMTL                                                          | AMTL     | 32       | AMTL     | 26       | 24       | AMTL     | 26       | 42          | AMTL     | 26       | 35          |
|              |                                                 | Predicted age                   | n/a                                                           | n/a      | 50       | n/a      | 38       | 42       | n/a      | 38       | 60          | n/a      | 38       | 53          |
| SMB 23       | 50-59                                           | Functional age                  | PMTL                                                          | PMTL     | 28       | PMTL     | PMTL     | 7        | AMTL     | 10       | AMTL        | AMTL     | 7        | AMTL        |
|              |                                                 | Predicted age                   | n/a                                                           | n/a      | 46       | n/a      | n/a      | 25       | n/a      | 22       | n/a         | n/a      | 19       | n/a         |
| SMB 59       | 50-59                                           | Functional age                  | AMTL                                                          | PMTL     | PMTL     | AMTL     | PMTL     | PMTL     | PMTL     | 7        | 7           | 30       | 13       | AMTL        |
|              |                                                 | Predicted age                   | n/a                                                           | n/a      | n/a      | n/a      | n/a      | n/a      | n/a      | 19       | 25          | 36       | 25       | n/a         |
| SMB 68       | 50-59                                           | Functional age                  | AMTL                                                          | 46       | 49       | PMTL     | PMTL     | PMTL     | AMTL     | 13       | 7           | AMTL     | 20       | 24          |
|              |                                                 | Predicted age                   | n/a                                                           | 58       | 67       | n/a      | n/a      | n/a      | n/a      | 25       | 24          | n/a      | 32       | 42          |

The oral health of a group of 19<sup>th</sup> Century South Australian settlers in relation to their general health and compared with that of contemporaneous samples. Gurr et al., 2023.

**\*Notes:** **Upp** = Upper jaw (maxilla), **Low** = Lower jaw (mandible), **R** = Right side of the jaw, **L** = left side of the jaw. **FDI** = Fédération Dentaire Internationale tooth identification notation system. **AMTL** = Antemortem tooth loss. **PMTL** = Post-mortem tooth loss. **N/A** = not applicable. Not erupted = the tooth had not erupted through the alveolar bone. The alveolar bone did not show signs of healing and dental radiographs confirmed that the tooth was *or* was not within the bone. '*Functional age of tooth*' was scored by the wear on the occlusal surface of the permanent **M1** (first molar), **M2** (second molar), and **M3** (third molar) following Miles's (1962) system. '*Predicted age of subject*' (individual person) following Miles's (1962) scoring system.
