# Supplementary material for: The Oral Health of a Group of 19th Century South Australian Settlers in Relation to Their General Health and Compared with That of Contemporaneous Samples
Source: MDPI journal article supplement (doi:10.3390/dj11040099), 2023-04-07
Supplement: s1 [file s1]

The oral health of a group of 19<sup>th</sup> Century South Australian settlers in relation to their general health and compared with that of contemporaneous samples. Gurr et al., 2023.

**Table S8a.** St Mary's Cemetery Sample. Location of carious lesions on the surface/s of the teeth.

| St Mary's ID | Estimation of age range skeletal & eruption findings (years) | Sex | *Total number of teeth present |  | **Caries above the CEJ | **Caries on the CEJ | **Caries below the CEJ |  | Location of caries: Mesial | Location of caries: Distal | Location of caries: Occlusal | Location of caries: Labial/Buccal | Location of caries: Lingual/Palatal | Total number of Carious lesions |
|--------------|--------------------------------------------------------------|-----|--------------------------------|--|------------------------|---------------------|------------------------|--|----------------------------|----------------------------|------------------------------|-----------------------------------|-------------------------------------|---------------------------------|
| SMB 19       | 6-10                                                         | U   | 22                             |  | 2                      | 1                   | 0                      |  | 2                          | 0                          | 0                            | 1                                 | 0                                   | 3                               |
| SMB 70       | 8-12                                                         | U   | 8                              |  | 2                      | 1                   | 0                      |  | 1                          | 1                          | 1                            | 0                                 | 0                                   | 3                               |
| SMB 28       | 10-14                                                        | U   | 26                             |  | 2                      | 0                   | 0                      |  | 0                          | 0                          | 1                            | 1                                 | 0                                   | 2                               |
| SMB 79       | 15-18                                                        | U   | 25                             |  | 11                     | 1                   | 0                      |  | 8                          | 4                          | 0                            | 1                                 | 0                                   | 13                              |
| SMB 05       | 20-29                                                        | F   | 6                              |  | 5                      | 1                   | 3                      |  | 2                          | 3                          | 0                            | 1                                 | 2                                   | 8                               |
| SMB 53C      | 30-39                                                        | F   | 9                              |  | 12                     | 0                   | 0                      |  | 8                          | 3                          | 1                            | 0                                 | 0                                   | 12                              |
| SMB 66B      | 30-39                                                        | F   | 17                             |  | 7                      | 7                   | 2                      |  | 6                          | 4                          | 2                            | 3                                 | 1                                   | 16                              |
| SMB 73       | 30-39                                                        | M   | 19                             |  | 5                      | 31                  | 3                      |  | 12                         | 14                         | 5                            | 4                                 | 4                                   | 39                              |
| SMB 06       | 40-49                                                        | M   | 24                             |  | 9                      | 1                   | 9                      |  | 3                          | 1                          | 5                            | 4                                 | 6                                   | 19                              |
| SMB 09       | 40-49                                                        | M   | 22                             |  | 11                     | 0                   | 0                      |  | 5                          | 6                          | 0                            | 0                                 | 0                                   | 11                              |
| SMB 57       | 40-49                                                        | M   | 25                             |  | 4                      | 5                   | 3                      |  | 2                          | 1                          | 3                            | 6                                 | 0                                   | 12                              |
| SMB 61       | 40-49                                                        | F   | 7                              |  | 5                      | 0                   | 0                      |  | 0                          | 3                          | 1                            | 1                                 | 0                                   | 5                               |
| SMB 72       | 40-49                                                        | M   | 29                             |  | 5                      | 8                   | 2                      |  | 2                          | 0                          | 5                            | 5                                 | 3                                   | 15                              |
| SMB 78       | 40-49                                                        | M   | 4                              |  | 0                      | 3                   | 0                      |  | 2                          | 1                          | 0                            | 0                                 | 0                                   | 3                               |
| SMB 83       | 40-49                                                        | M   | 16                             |  | 7                      | 0                   | 0                      |  | 1                          | 2                          | 4                            | 0                                 | 0                                   | 7                               |
| SMB 85       | 40-49                                                        | M   | 2                              |  | 1                      | 0                   | 0                      |  | 1                          | 0                          | 0                            | 0                                 | 0                                   | 1                               |
| SMB 14       | 50-59                                                        | M   | 2                              |  | 1                      | 0                   | 0                      |  | 0                          | 0                          | 0                            | 0                                 | 1                                   | 1                               |
| SMB 23       | 50-59                                                        | M   | 21                             |  | 15                     | 34                  | 5                      |  | 16                         | 16                         | 4                            | 10                                | 8                                   | 54                              |
| SMB 59       | 50-59                                                        | M   | 15                             |  | 2                      | 6                   | 2                      |  | 2                          | 2                          | 0                            | 6                                 | 0                                   | 10                              |
| SMB 63       | 50-59                                                        | M   | 3                              |  | 2                      | 1                   | 0                      |  | 2                          | 0                          | 0                            | 1                                 | 0                                   | 3                               |
| SMB 68       | 50-59                                                        | M   | 19                             |  | 6                      | 8                   | 0                      |  | 2                          | 4                          | 2                            | 6                                 | 0                                   | 14                              |
| TOTAL        |                                                              |     | 321                            |  | 114                    | 108                 | 29                     |  | 77                         | 65                         | 34                           | 50                                | 25                                  | 251                             |

Note: \*A tooth may have more than one carious lesion present. † CEJ= Cementoenamel Junction. \*\*More than one carious lesion may be present *above* and/or *on* and /or *below* the CEJ.

The oral health of a group of 19<sup>th</sup> Century South Australian settlers in relation to their general health and compared with that of contemporaneous samples. Gurr et al., 2023.

**Table S8b.** St Mary's Cemetery Sample. Number of carious lesions involving either the enamel only, the enamel and dentine, or the enamel, dentine and pulp.

| St Mary's ID | Estimation of age range skeletal & eruption findings (years) | Sex | *Total number of teeth present |  | Total number of Carious lesions present |  | Carious lesions involving the enamel | Carious lesions involving the enamel & dentine | Carious lesions involving the enamel, dentine & pulp |
|--------------|--------------------------------------------------------------|-----|--------------------------------|--|-----------------------------------------|--|--------------------------------------|------------------------------------------------|------------------------------------------------------|
| SMB 19       | 6-10                                                         | U   | 22                             |  | 3                                       |  | 3                                    | 0                                              | 0                                                    |
| SMB 70       | 8-12                                                         | U   | 8                              |  | 3                                       |  | 3                                    | 0                                              | 0                                                    |
| SMB 28       | 10-14                                                        | U   | 26                             |  | 2                                       |  | 2                                    | 0                                              | 0                                                    |
| SMB 79       | 15-18                                                        | U   | 25                             |  | 12                                      |  | 11                                   | 1                                              | 0                                                    |
| SMB 05       | 20-29                                                        | F   | 6                              |  | 9                                       |  | 7                                    | 2                                              | 0                                                    |
| SMB 53C      | 30-39                                                        | F   | 9                              |  | 12                                      |  | 11                                   | 1                                              | 0                                                    |
| SMB 66B      | 30-39                                                        | F   | 17                             |  | 16                                      |  | 14                                   | 2                                              | 0                                                    |
| SMB 73       | 30-39                                                        | M   | 19                             |  | 39                                      |  | 39                                   | 0                                              | 0                                                    |
| SMB 06       | 40-49                                                        | M   | 24                             |  | 19                                      |  | 19                                   | 0                                              | 0                                                    |
| SMB 09       | 40-49                                                        | M   | 22                             |  | 11                                      |  | 11                                   | 0                                              | 0                                                    |
| SMB 57       | 40-49                                                        | M   | 25                             |  | 12                                      |  | 9                                    | 3                                              | 0                                                    |
| SMB 61       | 40-49                                                        | F   | 7                              |  | 5                                       |  | 1                                    | 2                                              | 2                                                    |
| SMB 72       | 40-49                                                        | M   | 29                             |  | 15                                      |  | 15                                   | 0                                              | 0                                                    |
| SMB 78       | 40-49                                                        | M   | 4                              |  | 3                                       |  | 3                                    | 0                                              | 0                                                    |
| SMB 83       | 40-49                                                        | M   | 16                             |  | 7                                       |  | 7                                    | 0                                              | 0                                                    |
| SMB 85       | 40-49                                                        | M   | 2                              |  | 1                                       |  | 1                                    | 0                                              | 0                                                    |
| SMB 14       | 50-59                                                        | M   | 2                              |  | 1                                       |  | 1                                    | 0                                              | 0                                                    |
| SMB 23       | 50-59                                                        | M   | 21                             |  | 54                                      |  | 50                                   | 2                                              | 2                                                    |
| SMB 59       | 50-59                                                        | M   | 15                             |  | 10                                      |  | 9                                    | 1                                              | 0                                                    |
| SMB 63       | 50-59                                                        | M   | 3                              |  | 3                                       |  | 2                                    | 0                                              | 1                                                    |
| SMB 68       | 50-59                                                        | M   | 19                             |  | 14                                      |  | 14                                   | 0                                              | 0                                                    |
| TOTAL        |                                                              |     | 321                            |  | 251                                     |  | 232                                  | 14                                             | 5                                                    |

Note: \*A tooth may have more than one carious lesion present.
