# Supplementary material for: The Oral Health of a Group of 19th Century South Australian Settlers in Relation to Their General Health and Compared with That of Contemporaneous Samples
Source: Dent J (Basel). 2023 Apr 7;11(4):99. doi: 10.3390/dj11040099 (PMC10136771; doi:10.3390/dj11040099)
Supplement: Supplementary file 1 [file dentistry-11-00099-s001.zip]

Archive with 11 entries (11 files):
- Supplementary_Data S1. Gurr. 2022_RAW DATA_Statistical Analysis_EXCEL_.xlsx
- Supplementary_Table S1. Dental Inventory_Dental & Skeletal Age Ranges_Sex_.pdf
- Supplementary_Table S10. EH_number of defects per tooth.pdf
- Supplementary_Table S2. LV Micro-CT Scan Settings.pdf
- Supplementary_Table S3. SV Micro-CT list_individuals, tooth type & number.pdf
- Supplementary_Table S4. Intra & Inter-Op Results_Statiscal Analysis Summary_.pdf
- Supplementary_Table S5. Additional Info_Intra & Inter-Op Results_Statiscal Analysis_.pdf
- Supplementary_Table S6. Miles (1962) Tooth wear_functional age of tooth & Predicted age range of subject.pdf
- Supplementary_Table S7. a-c_MOLNAR ( 1971) St Mary's Adults_.pdf
- Supplementary_Table S8. a,b_Carious Lesions_locations_ (AutoRecovered).pdf
- Supplementary_Table S9. Calculus_Adults_St Mary's.pdf
